# Supplementary material
Source: PubMed Central journal article supplement (PMC2826105)
Supplement: NIHMS173172-supplement-1_si_001.pdf [file NIHMS173172-supplement-1_si_001.pdf]

# An On-Line, High-Pressure Digestion System for Protein Characterization by Hydrogen Deuterium Exchange

Lisa M. Jones, Hao Zhang, Ilan Vidavsky, and Michael L. Gross

Department of Chemistry, Washington University, St. Louis, MO 63130

## Supplementary material

### EXPERIMENTAL SECTION

**Digestion Apparatus.** The apparatus was plumbed with silica tubing (O.D. 360  $\mu\text{m}$ , I.D. 150  $\mu\text{m}$ ), and a 20  $\mu\text{L}$  sample loop was used for protein injection. For digestion, a constant flow of solvent A (99.9%  $\text{H}_2\text{O}$ , 0.1% formic acid) was kept through the system. An 8 min gradient from 0-100% solvent B (99.9% acetonitrile, 0.1% formic acid) with a flow rate of 40  $\mu\text{L}/\text{min}$  was run prior to MS analysis.

**Back Exchange Correction.** To account for back exchange during analysis, the deuterium content was calculated from:

$$D_{\text{H}\rightarrow\text{D}} = \frac{m - m_{0\%}}{m_{100\%} - m_{0\%}} \times N$$

where,  $m$ ,  $m_{0\%}$ , and  $m_{100\%}$  are the centroids for each peptide peak after a specified HDX period, zero-time control, and the 100% control. The 100% exchange control was the result for 48 hr exchange. The average back exchange for both the high and low pressure digestion was ~20%.
